# Supplementary material for: SLO-2 Is Cytoprotective and Contributes to Mitochondrial Potassium Transport
Source: PLOS journal article supplement (doi:10.1371/journal.pone.0028287), 2011-12-01
Supplement: S5 (10.1371/journal.pone.0028287.s005) [file journal.pone.0028287.s005]

### **Supplementary Tables:**

| <i>Treatment</i>          | <i>Δ Fluorescence (arbitrary units)</i> |             |
|---------------------------|-----------------------------------------|-------------|
|                           | <i>TMRE</i>                             | <i>JC-1</i> |
| Control                   | 46.2 ± 4.8                              | 2.63 ± 0.34 |
| Bithionol (2.5 μM)        | 44.8 ± 4.8                              | 3.01 ± 0.04 |
| CaCl <sub>2</sub> (25 μM) | 46.7 ± 4.9                              | 2.59 ± 0.32 |
| Paxilline (1 μM)          | 45.6 ± 4.4                              | 2.88 ± 0.07 |
| Bepridil (10 μM)          | -                                       | 2.98 ± 0.12 |

**Table S1. Mitochondrial membrane potential is not affected by channel modulators.**

Mitochondria were isolated from WT (C57BL/6) mice and loaded with a fluorescent indicator (TMRE 20 nM or JC-1 0.2 μg/mL) in the presence of either Bithionol (2.5 μM), CaCl<sub>2</sub> (25 μM), Paxilline (1 μM) or Bepridil (10 μM). Fluorescent indicators accumulate in mitochondria in relation to membrane potential ( $\Delta\psi_m$ ). Following stabilization,  $\Delta\psi_m$  was collapsed via addition of  $\Delta\psi_m$  FCCP (10 μM) resulting in a re-distribution of the fluorescent indicator, resulting in a decrease in fluorescence. All data are means ± SEM, N≥3 and are not significantly different (N=independent mitochondria isolation of ≥3 mouse hearts).
