# Supplementary material for: SLO-2 Is Cytoprotective and Contributes to Mitochondrial Potassium Transport
Source: PLOS journal article supplement (doi:10.1371/journal.pone.0028287), 2011-12-01
Supplement: S6 (10.1371/journal.pone.0028287.s006) [file journal.pone.0028287.s006]

**Supplementary Tables:**

| <i>Parameter (units)</i>   | <i>FVB WT</i> | <i>FVB Slo1<sup>-/-</sup></i> |
|----------------------------|---------------|-------------------------------|
| Heart Rate (BPM)           | 466 ± 7       | 429 ± 14*                     |
| PR interval (ms)           | 28 ± 0.5      | 28 ± 0.5                      |
| QRS diameter (ms)          | 17 ± 0.3      | 18 ± 0.5                      |
| Corrected QT interval (ms) | 57 ± 0.8      | 56 ± 1.2                      |

**Table S2. EKG parameters of Avertin anesthetized wild-type (WT) and Slo1<sup>-/-</sup> littermate FVB mice.** EKG was collected as outlined in the methods. All data are means ± SEM, N≥13  
\*p<0.05 vs. WT.
